# Supplementary material for: Chiral self-organization of the TPPS4 porphyrin assisted by molecular rotations
Source: Royal Society of Chemistry journal article supplement (doi:10.1039/d3me00072a), 2023-01-01
Supplement: d3me00072a1.pdf [file d3me00072a1.pdf]

## Supplementary Material

### Predictions of the chiral self-assembling of TPPS<sub>4</sub> porphyrin aggregates perturbed by molecular rotations

Gioacchino Schifino<sup>1</sup>, Mariagrazia Fortino<sup>1</sup>, Luigi Monsù Scolaro<sup>2</sup>, Adriana Pietropaolo<sup>1\*</sup>

#### AFFILIATIONS

<sup>1</sup> Dipartimento di Scienze della salute, Università Magna Græcia di Catanzaro, Viale Europa, Catanzaro.

<sup>2</sup> Dipartimento di Scienze Chimiche, biologiche, farmaceutiche e ambientali Università degli Studi di Messina, V.le F. Stagno D'Alcontres 31, Vill. S. Agata, Messina

**\* Authors to whom correspondence should be addressed:**

apietropaolo@unicz.it,

#### Contents

|                                                                                                                                          |    |
|------------------------------------------------------------------------------------------------------------------------------------------|----|
| 1. Figure of the potential energy scan describing the rotations of the sulfonatophenyl substituents attached to the porphyrin macrocycle | 1  |
| 2. Figure of the chosen collective variables                                                                                             | 1  |
| 3. Figures of the evolution of the dihedral angles                                                                                       | 2  |
| 4. Figures of the evolution of the distances between two porphyrins                                                                      | 5  |
| 5. Figures of the evolution of the tilting angles                                                                                        | 9  |
| 6. Figures of the free-energy profiles                                                                                                   | 12 |

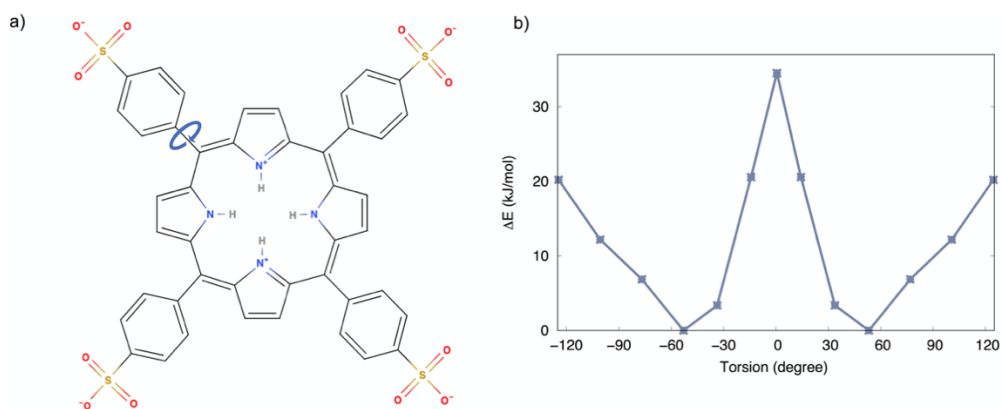

**Figure S1.** a) A sketch of the  $H_4TPPS_4^{2-}$  molecule under study. b) Adiabatic free-energy barriers related to the internal rotation of a single *meso*-sulfonatophenyl group attached to a porphyrin macrocycle.

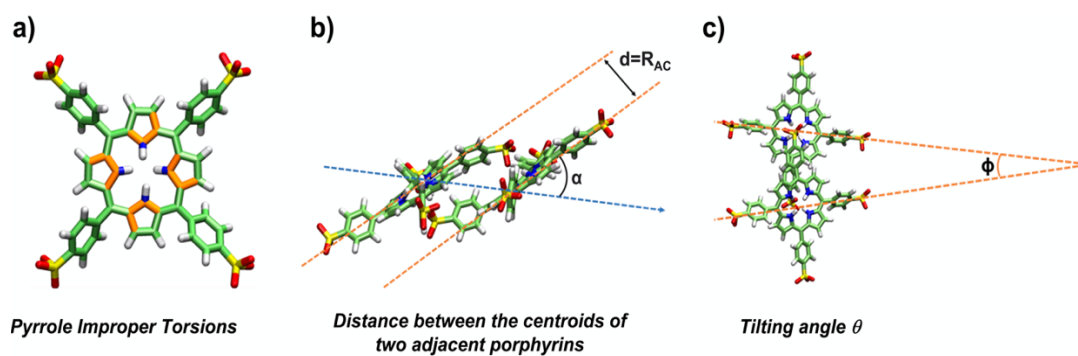

**Figure S2.** a) The four pyrrole torsions identifying the collective variables for the free-energy simulations. b)-c) The stacking distance and tilting angle defining the J-aggregate.

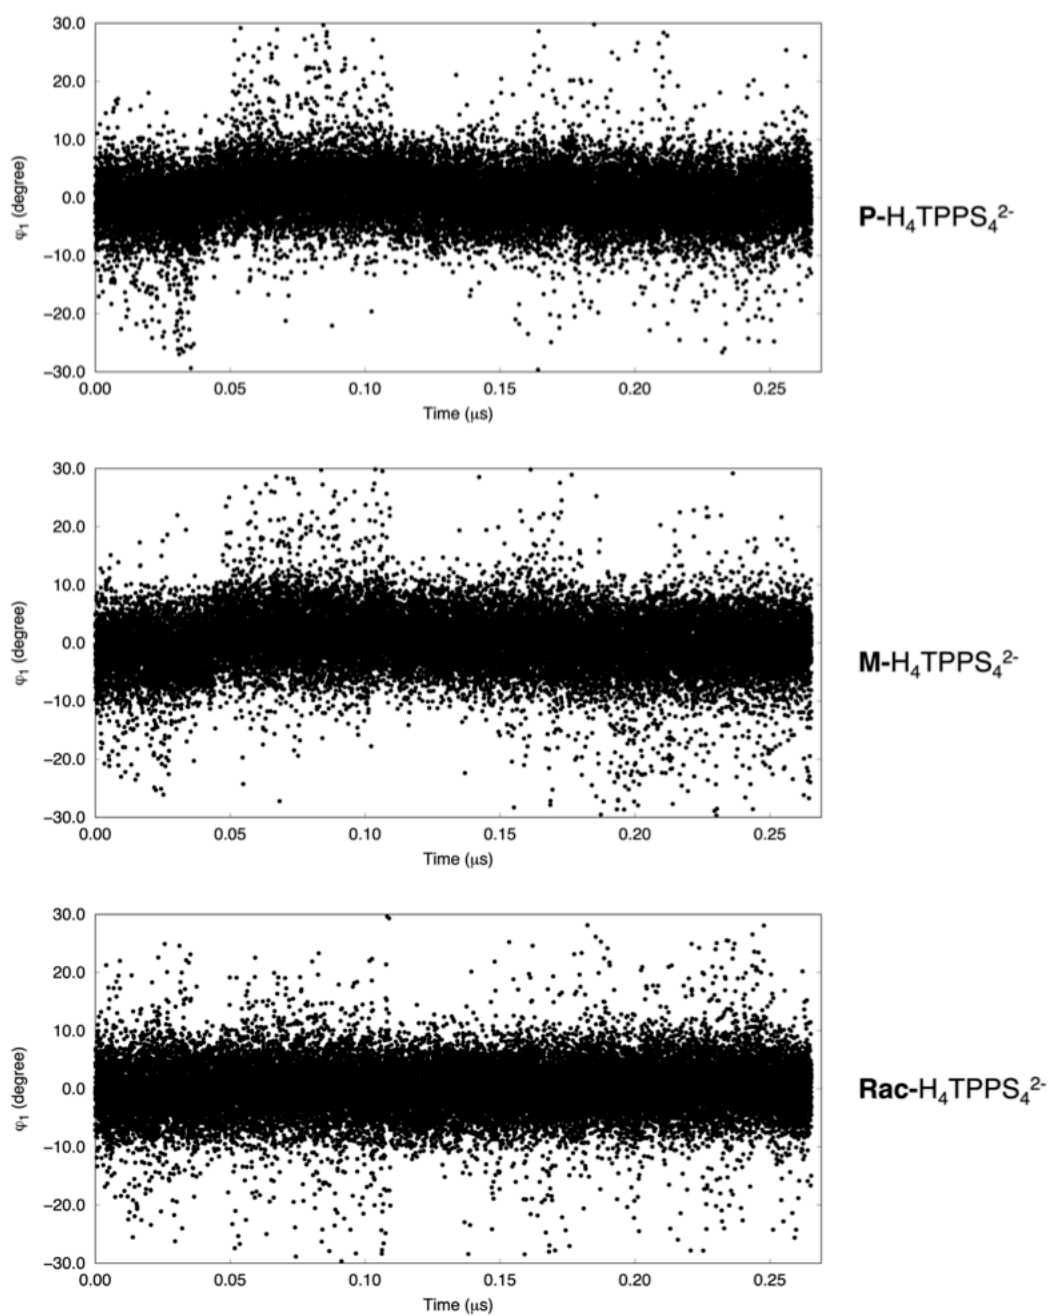

**Figure S3.** Variation of the representative dihedrals (pyrrole dihedral angles  $\phi_1$ ) of a **P-** H<sub>4</sub>TPPS<sub>4</sub><sup>2-</sup> (replica 1) **M-** H<sub>4</sub>TPPS<sub>4</sub><sup>2-</sup> (replica 2) and **Rac-** H<sub>4</sub>TPPS<sub>4</sub><sup>2-</sup> (replica 3) monomers as a function of the simulation progress, for the free-energy simulations.

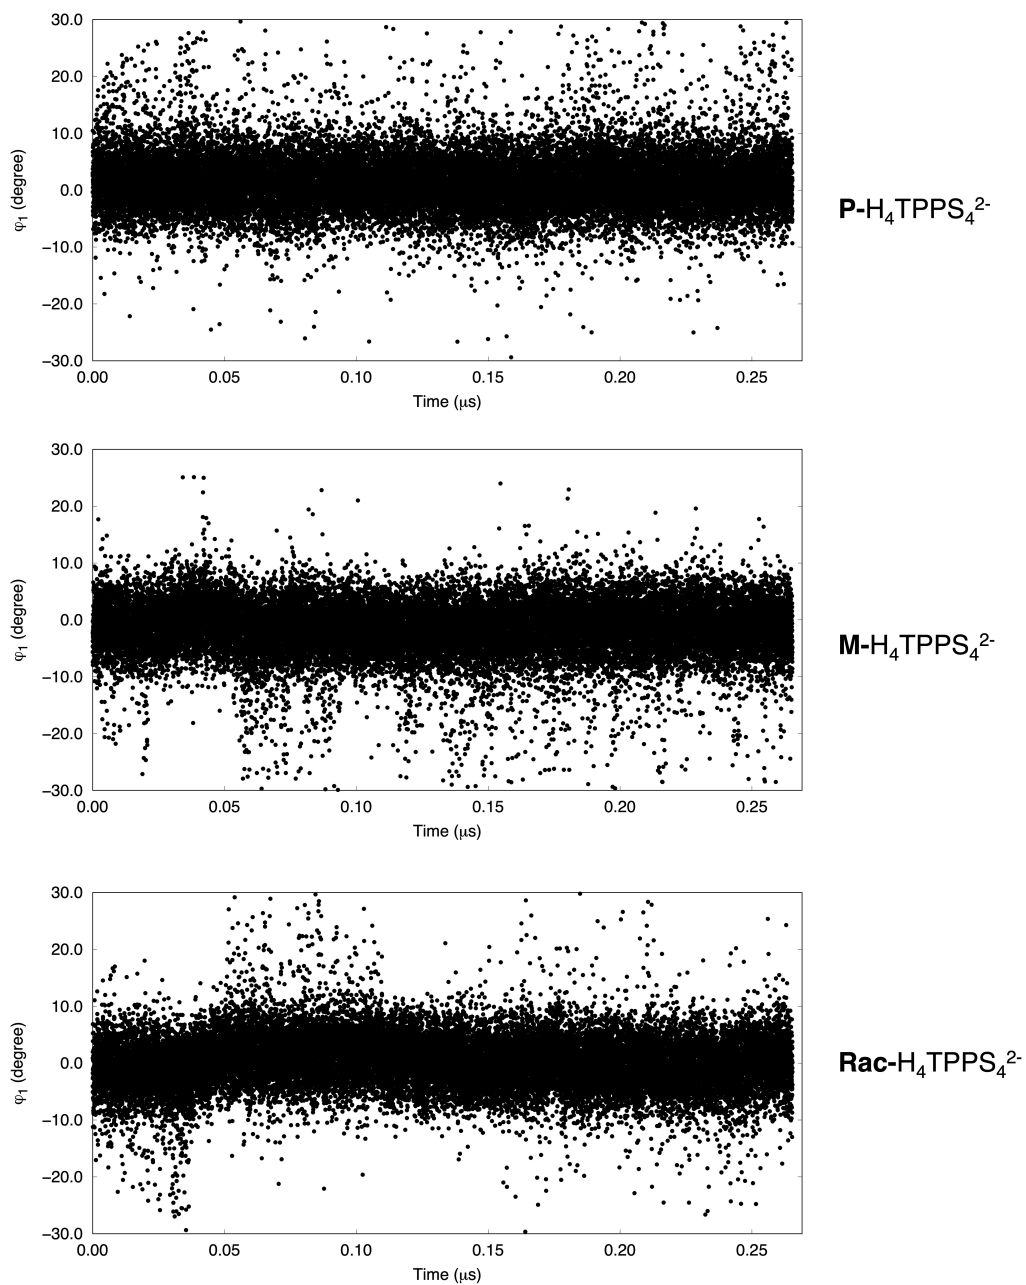

**Figure S4.** Variation of the representative dihedrals (pyrrole dihedral angles  $\phi_1$ ) of a **P-  $\text{H}_4\text{TPPS}_4^{2-}$** , **M-  $\text{H}_4\text{TPPS}_4^{2-}$**  and **Rac-  $\text{H}_4\text{TPPS}_4^{2-}$**  dimers as a function of the simulation progress, for the free-energy simulations.

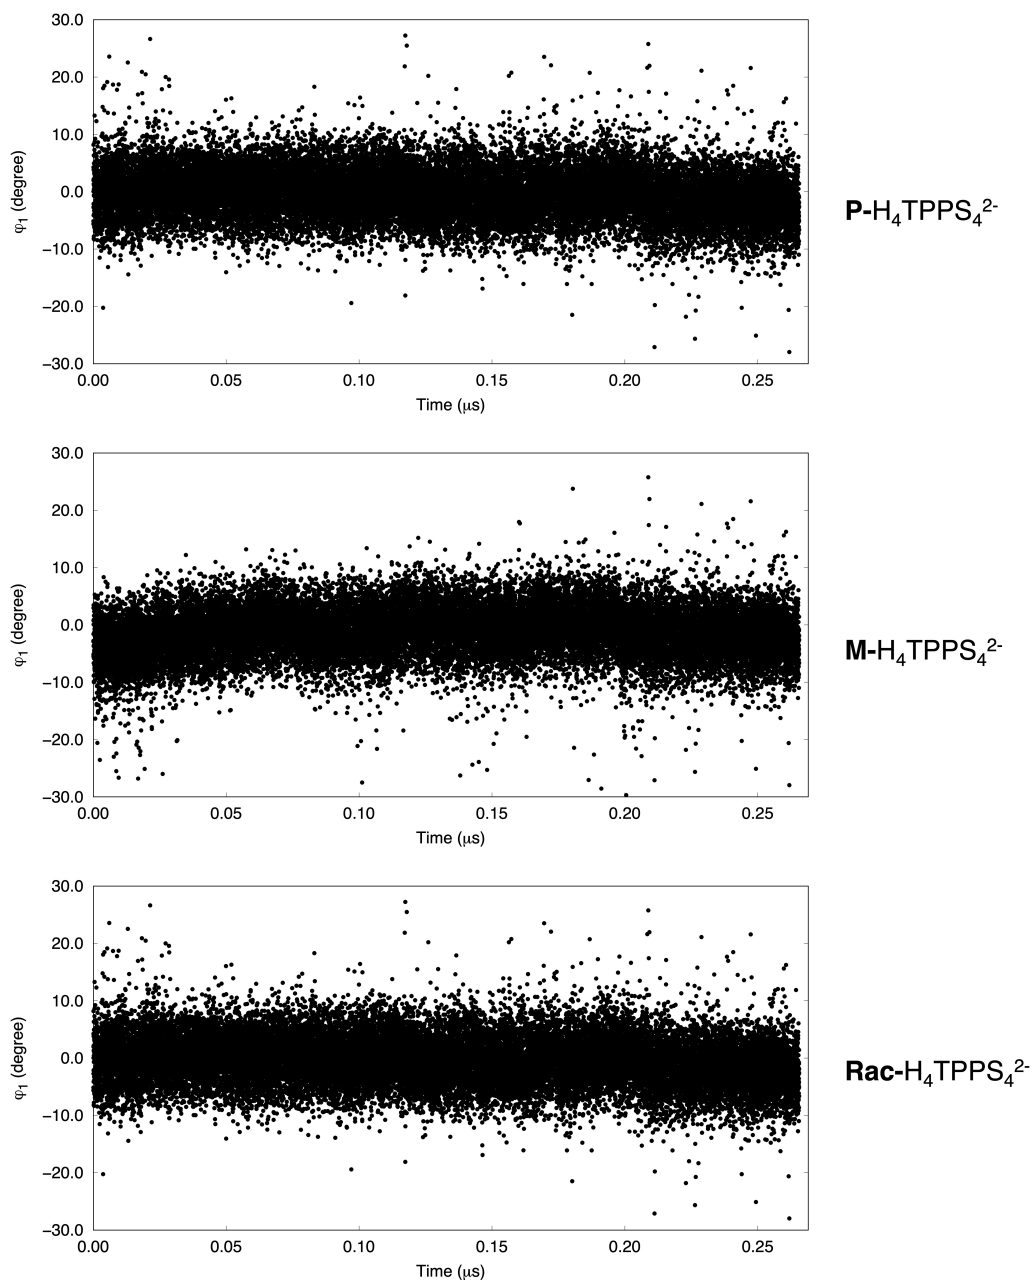

**Figure S5.** Variation of the representative dihedrals (pyrrole dihedral angles  $\phi_1$ ) of a **P- $\text{H}_4\text{TPPS}_4^{2-}$** , **M- $\text{H}_4\text{TPPS}_4^{2-}$**  and **Rac- $\text{H}_4\text{TPPS}_4^{2-}$**  trimers as a function of the simulation progress, for the free-energy simulations.

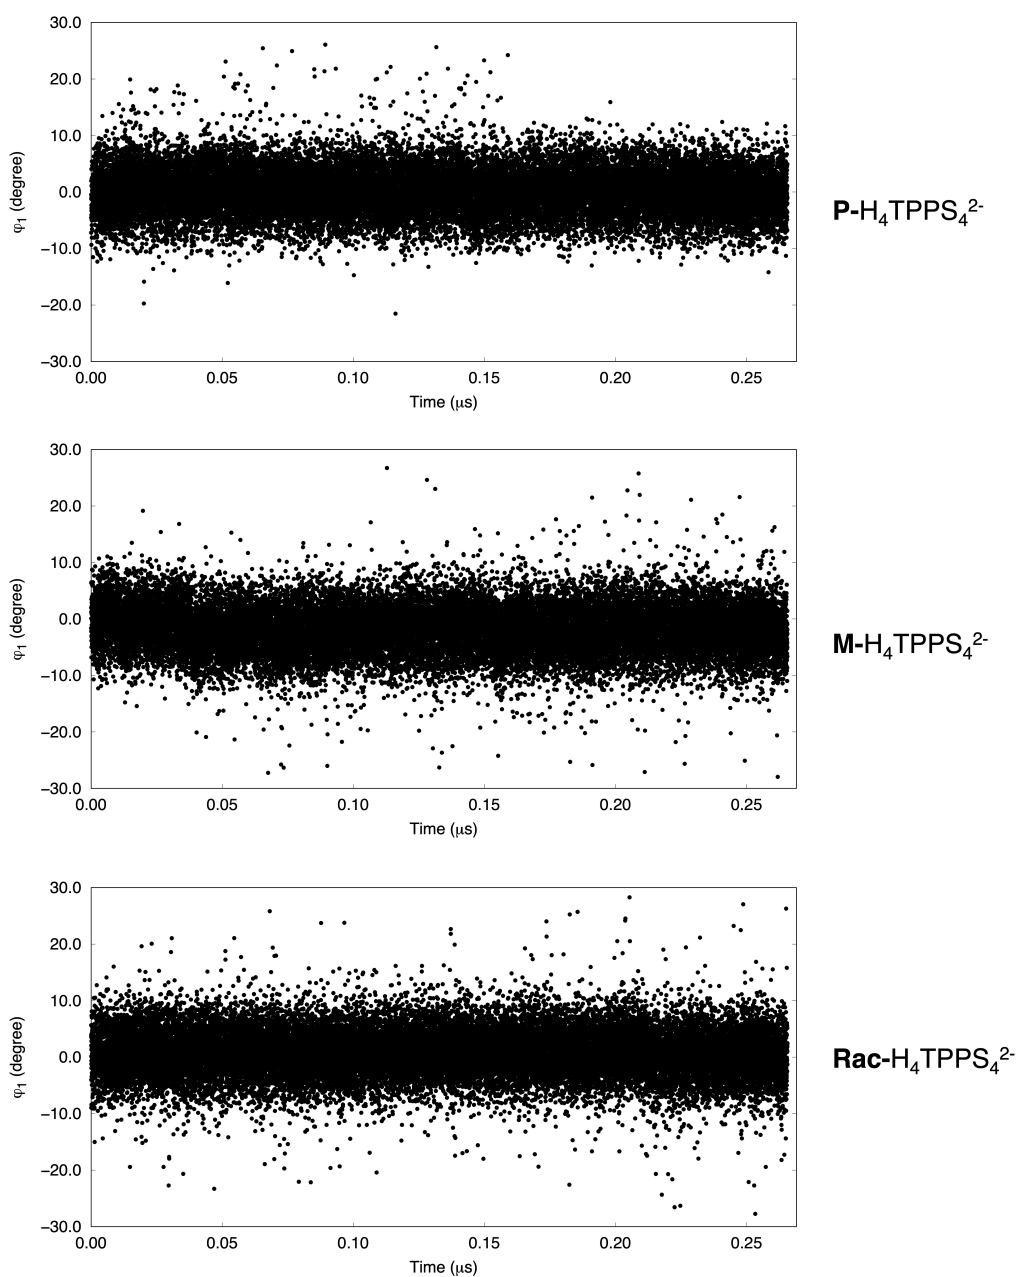

**Figure S6.** Variation of the representative dihedrals (pyrrole dihedral angles  $\phi_1$ ) of a **P-** H<sub>4</sub>TPPS<sub>4</sub><sup>2-</sup> **M-** H<sub>4</sub>TPPS<sub>4</sub><sup>2-</sup> and **Rac-** H<sub>4</sub>TPPS<sub>4</sub><sup>2-</sup> tetramers as a function of the simulation progress, for the free-energy simulations.

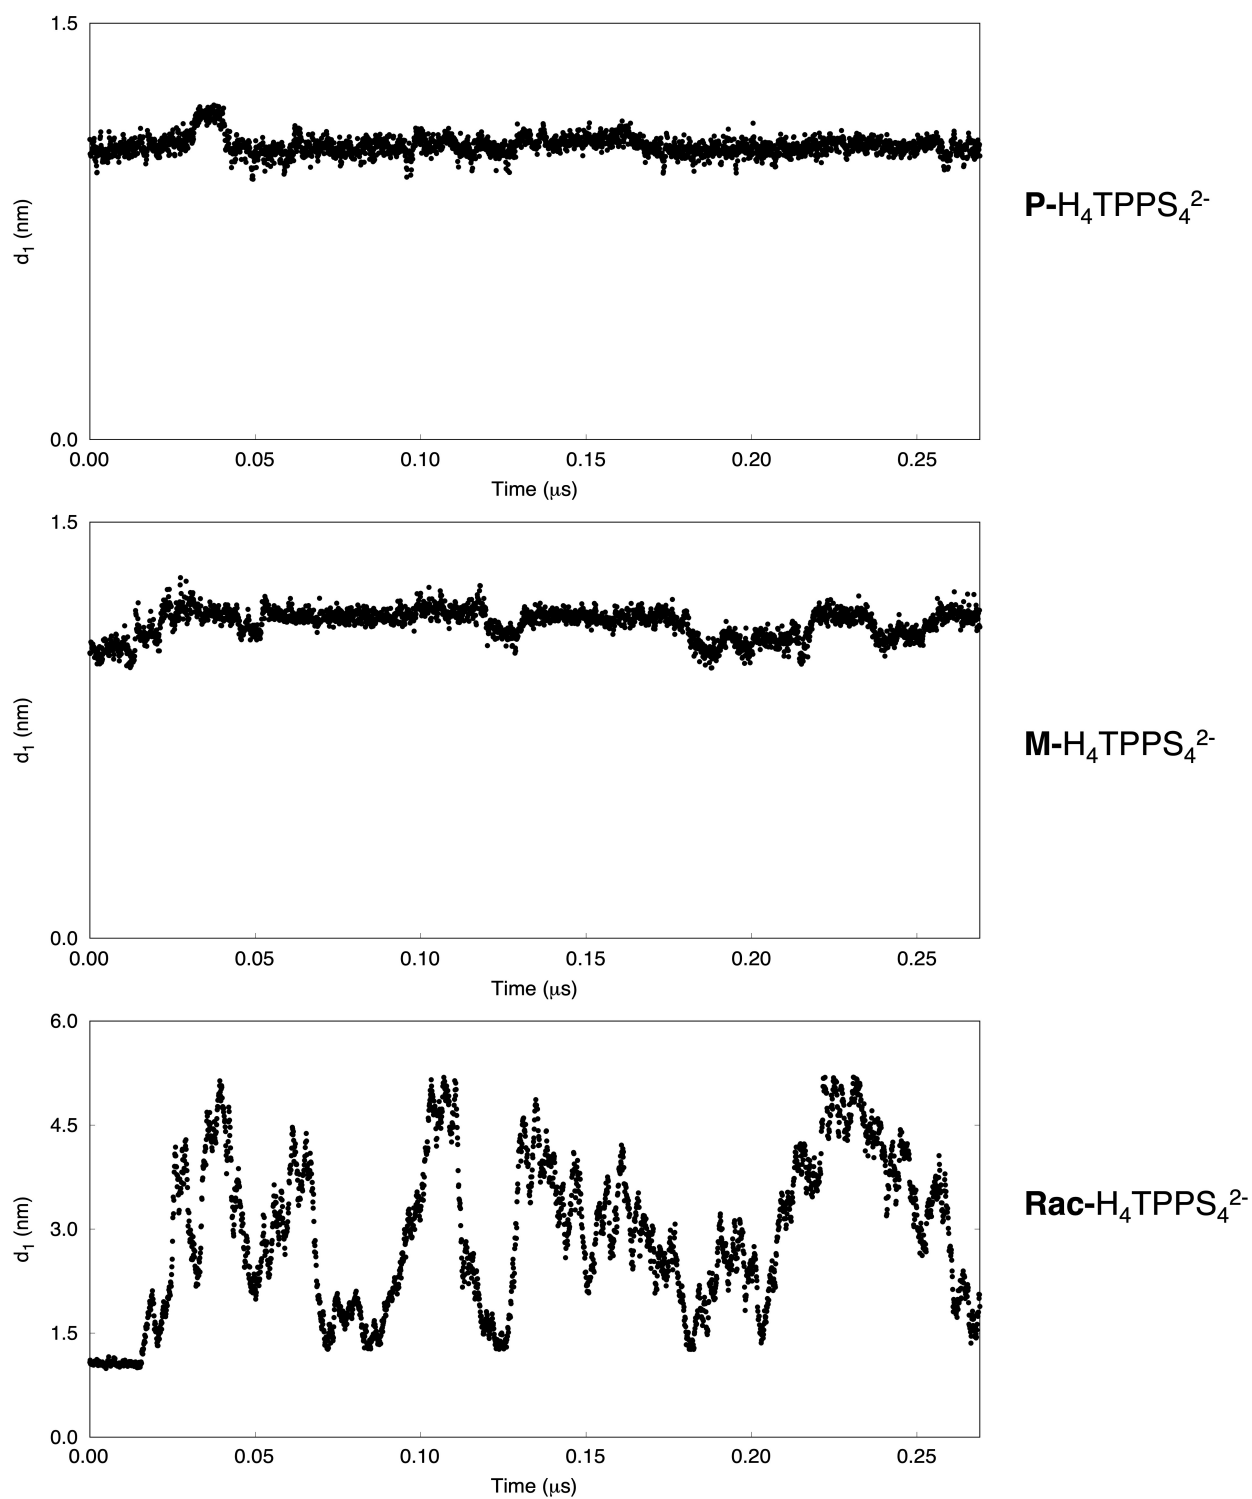

**Figure S7.** Variation of the representative distance between two adjacent porphyrins of a **P- $\text{H}_4\text{TPPS}_4^{2-}$** , **M- $\text{H}_4\text{TPPS}_4^{2-}$**  and **Rac- $\text{H}_4\text{TPPS}_4^{2-}$**  dimers as a function of the simulation progress, for the free-energy simulations.

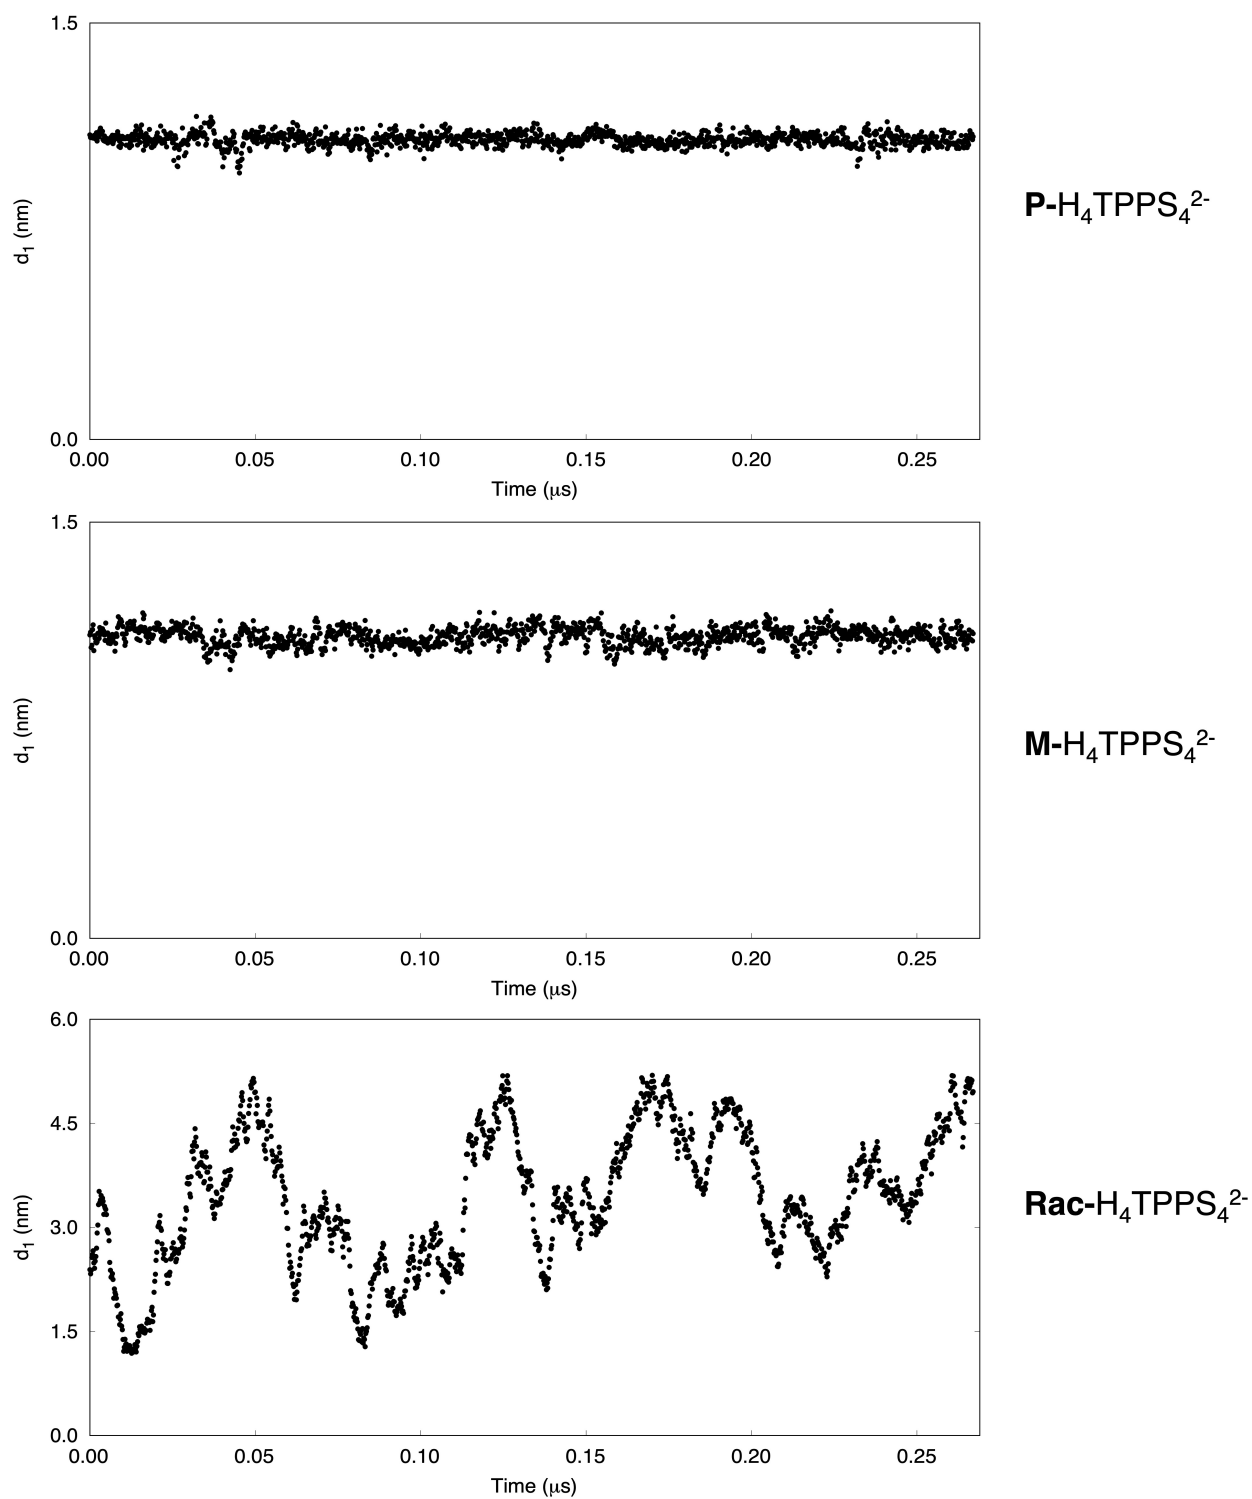

**Figure S8.** Variation of the representative distance between two adjacent porphyrins of a **P- $\text{H}_4\text{TPPS}_4^{2-}$** , **M- $\text{H}_4\text{TPPS}_4^{2-}$**  and **Rac- $\text{H}_4\text{TPPS}_4^{2-}$**  trimers as a function of the simulation progress, for the free-energy simulations.



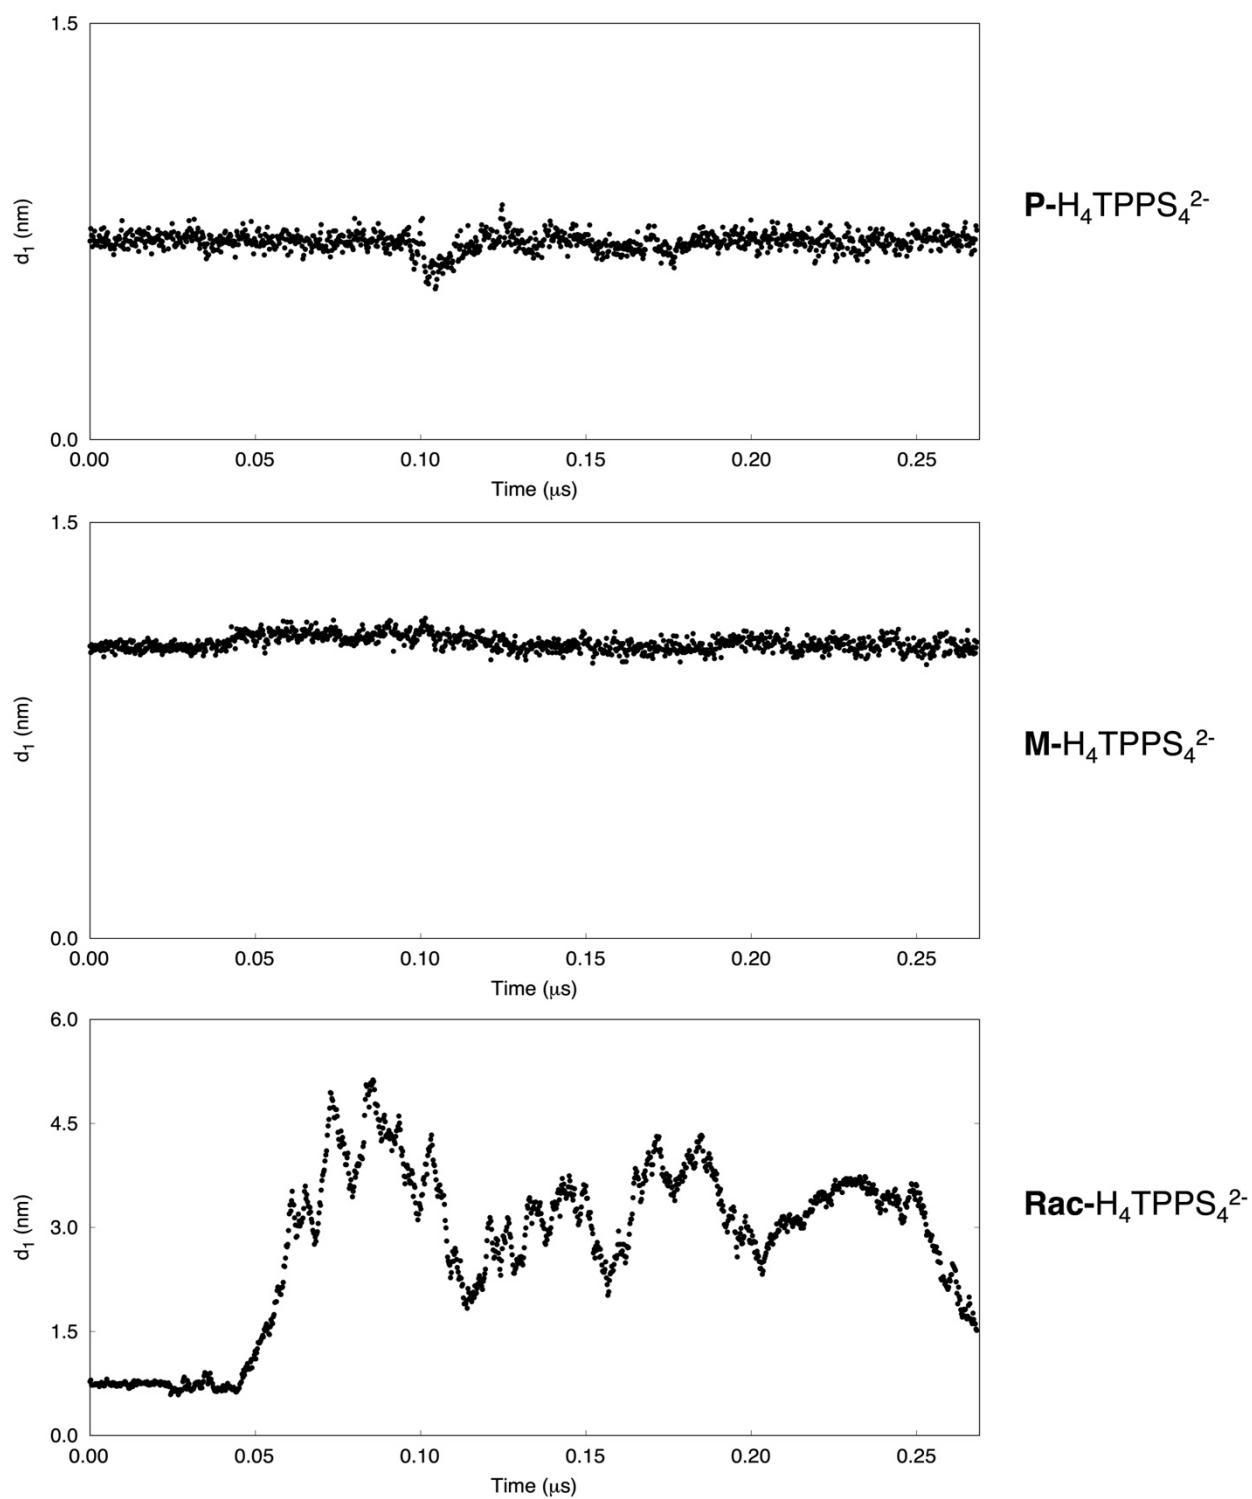

**Figure S9.** Variation of the representative distance between two adjacent porphyrins of a **P- $\text{H}_4\text{TPPS}_4^{2-}$** , **M- $\text{H}_4\text{TPPS}_4^{2-}$**  and **Rac- $\text{H}_4\text{TPPS}_4^{2-}$**  tetramers as a function of the simulation progress, for the free-energy simulations.

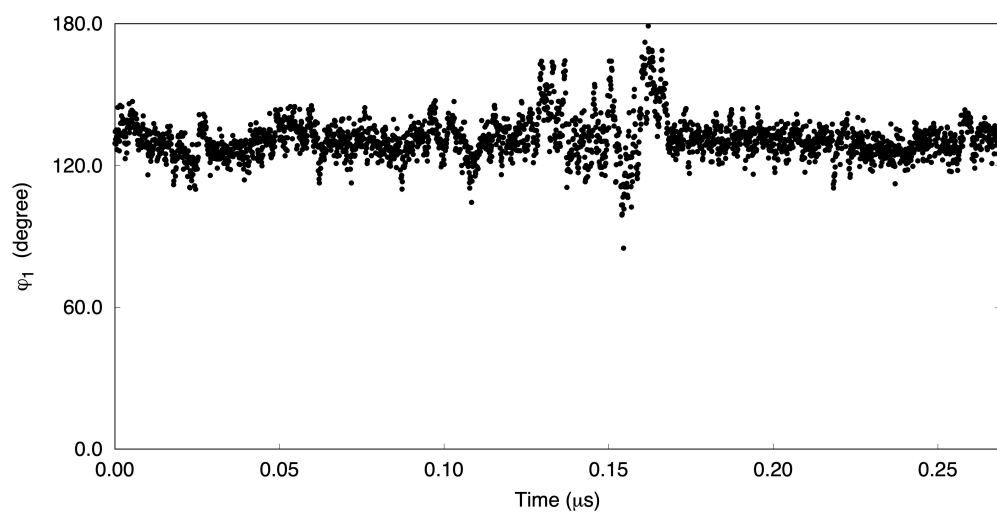

**P-H<sub>4</sub>TPPS<sub>4</sub><sup>2-</sup>**

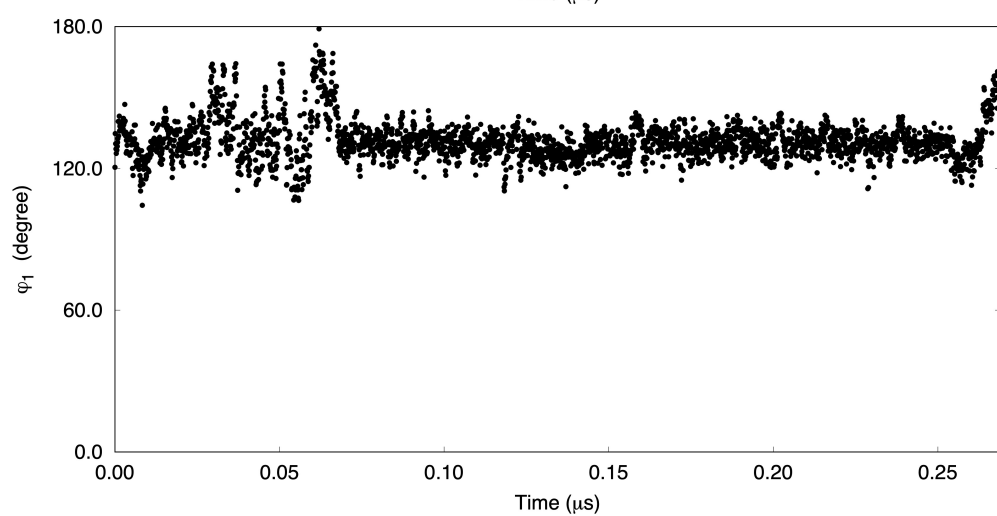

**M-H<sub>4</sub>TPPS<sub>4</sub><sup>2-</sup>**

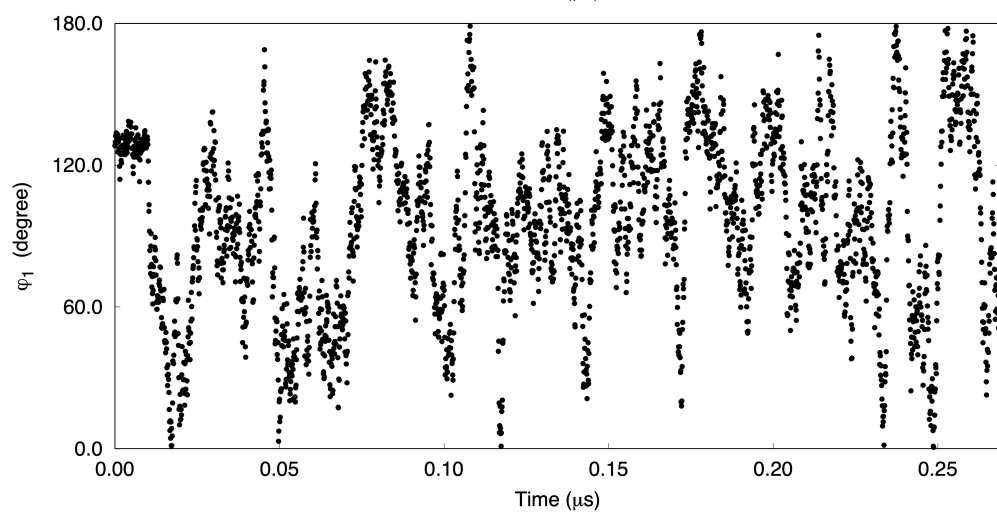

**Rac-H<sub>4</sub>TPPS<sub>4</sub><sup>2-</sup>**

**Figure S10.** Variation of the representative tilting angle of a **P-** H<sub>4</sub>TPPS<sub>4</sub><sup>2-</sup> **M-** H<sub>4</sub>TPPS<sub>4</sub><sup>2-</sup> and **Rac-** H<sub>4</sub>TPPS<sub>4</sub><sup>2-</sup> dimers as a function of the simulation progress, for the free-energy simulations.

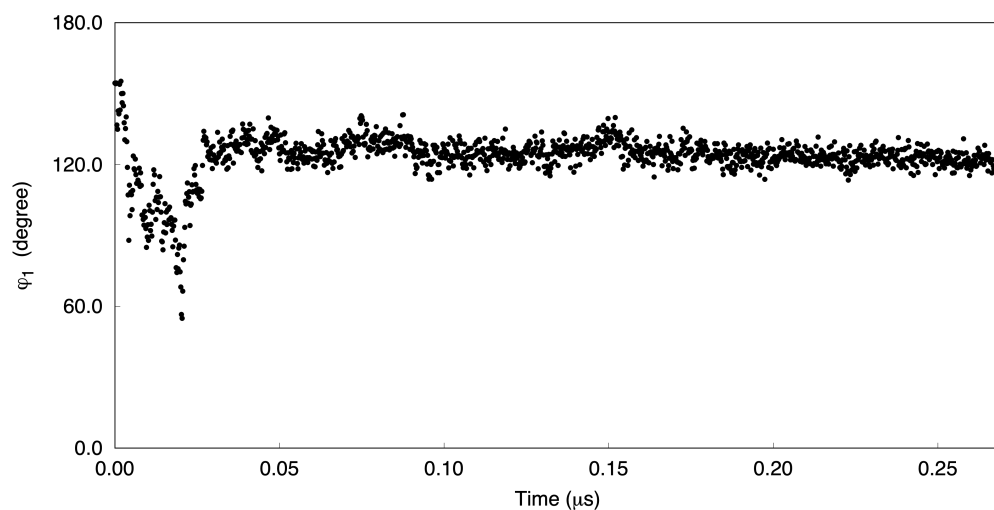

**P-H<sub>4</sub>TPPS<sub>4</sub><sup>2-</sup>**

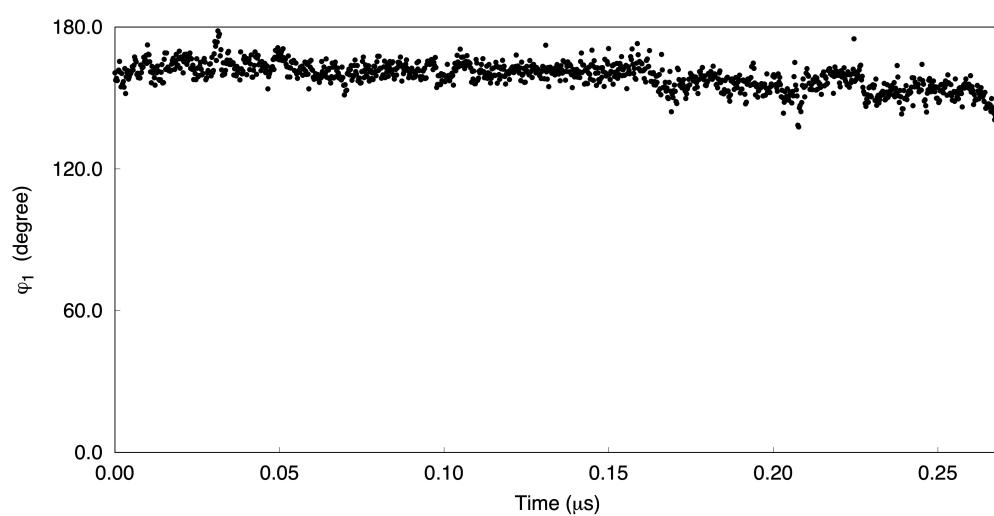

**M-H<sub>4</sub>TPPS<sub>4</sub><sup>2-</sup>**

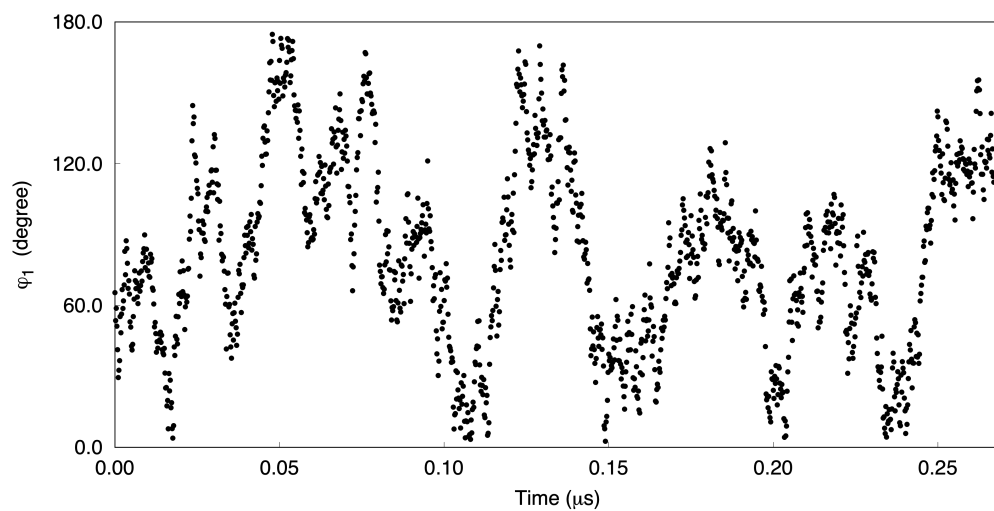

**Rac-H<sub>4</sub>TPPS<sub>4</sub><sup>2-</sup>**

**Figure S11.** Variation of the representative tilting angle of a **P-H<sub>4</sub>TPPS<sub>4</sub><sup>2-</sup>**, **M-H<sub>4</sub>TPPS<sub>4</sub><sup>2-</sup>** and **Rac-H<sub>4</sub>TPPS<sub>4</sub><sup>2-</sup>** trimers as a function of the simulation progress, for the free-energy simulations.

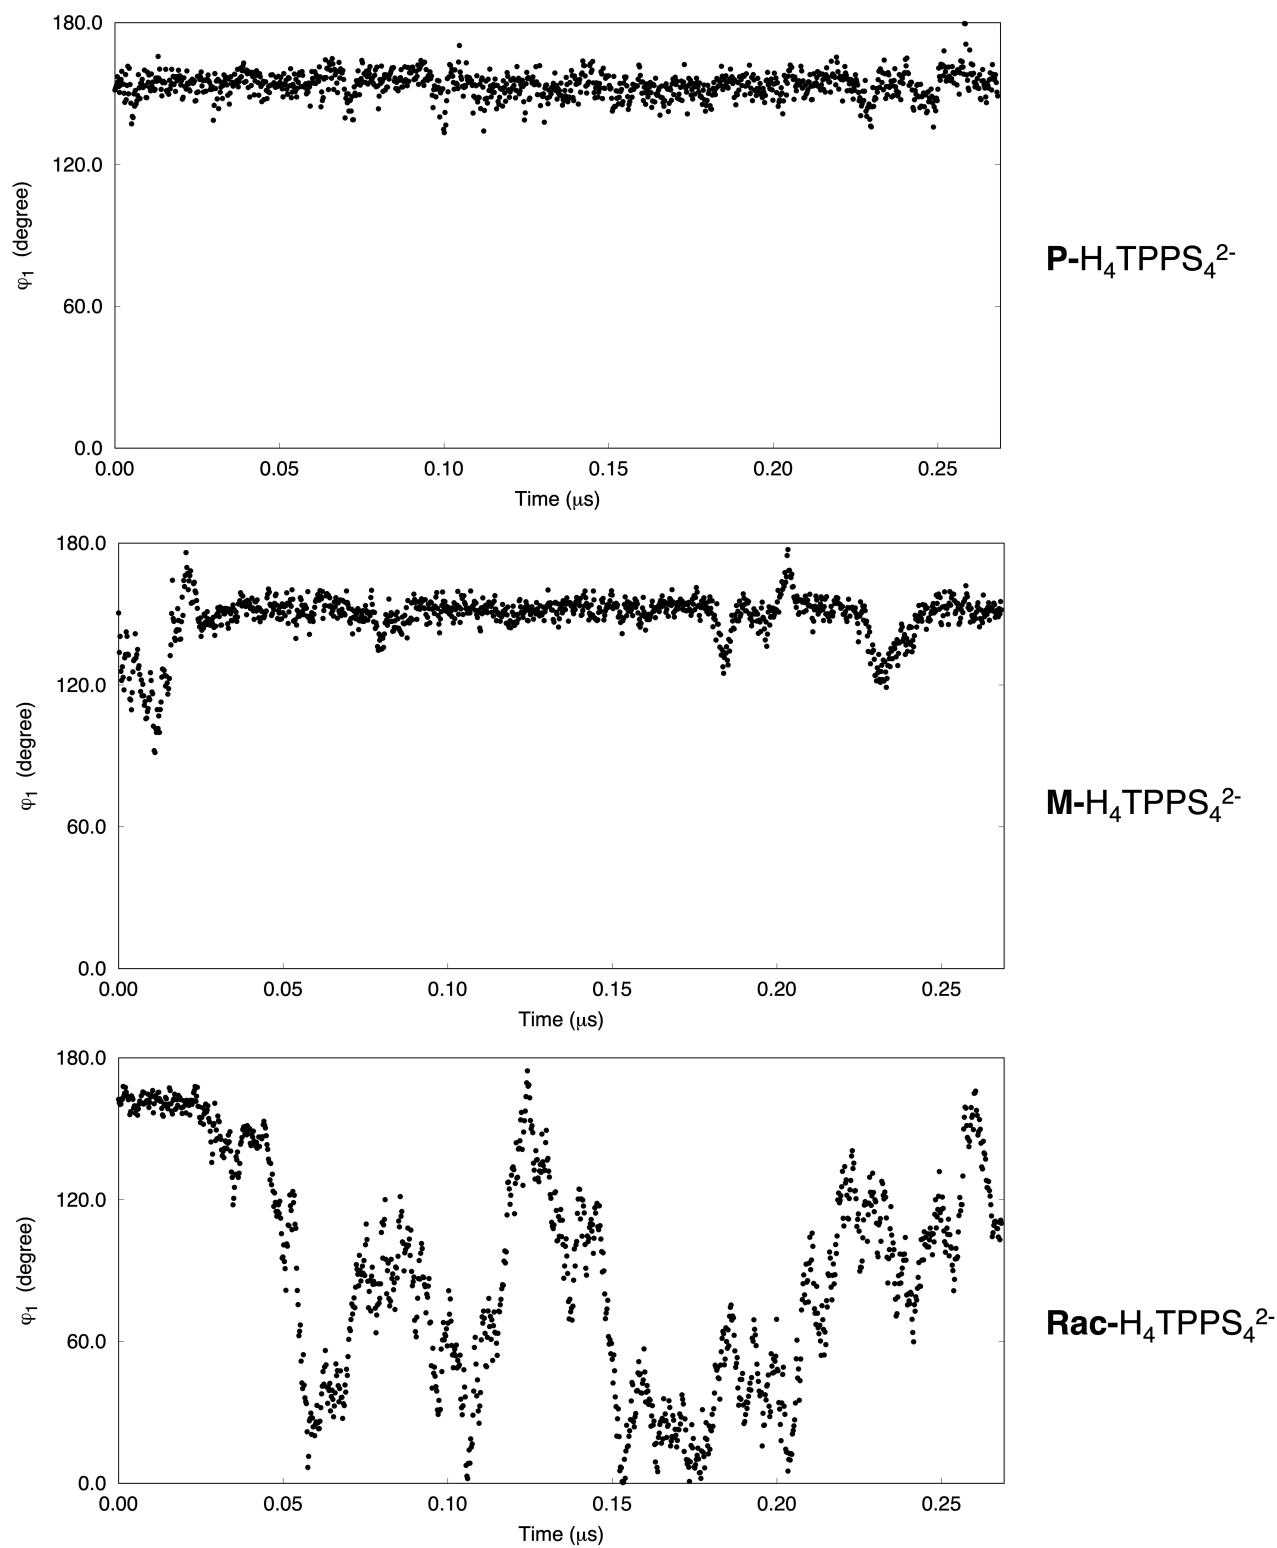

**Figure S12.** Variation of the representative tilting angle of a **P-** H<sub>4</sub>TPPS<sub>4</sub><sup>2-</sup> **M-** H<sub>4</sub>TPPS<sub>4</sub><sup>2-</sup> and **Rac-** H<sub>4</sub>TPPS<sub>4</sub><sup>2-</sup> tetramers as a function of the simulation progress, for the free-energy simulations.

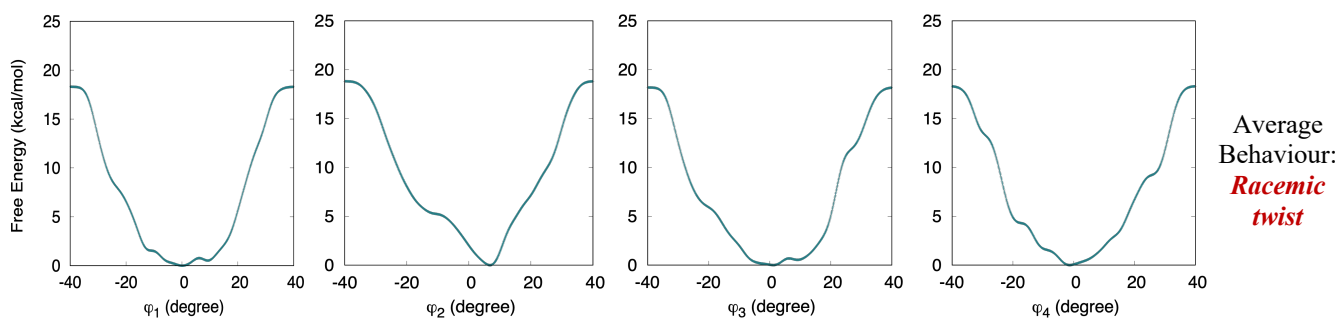

**Figure S13.** Mono-dimensional free-energy profiles computed for the **P-H<sub>4</sub>TPPS<sub>4</sub><sup>2-</sup>** monomer using the PB-MetaD approach, as a function of the pyrrole dihedral angles  $\phi_1$ ,  $\phi_2$ ,  $\phi_3$ ,  $\phi_4$ . These maps have been constructed considering the data of P-H<sub>4</sub>TPPS<sub>4</sub><sup>2-</sup>, with all the four sulfonato-phenyl dihedral angles positive.

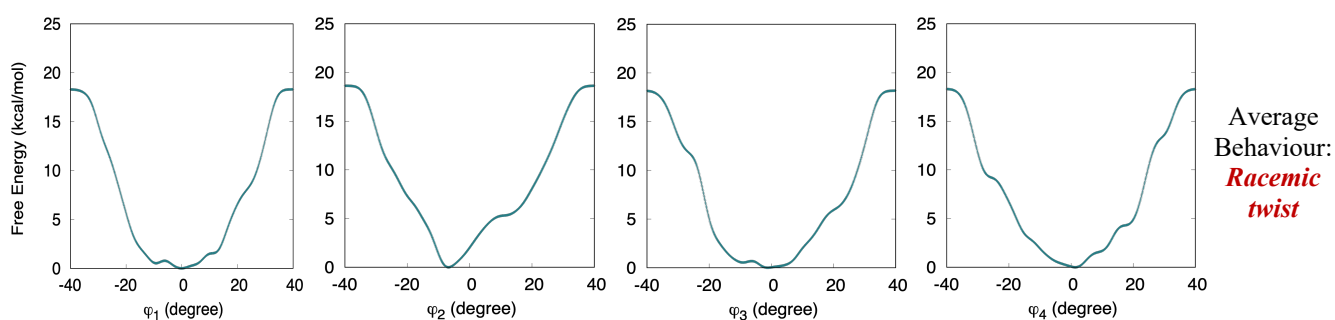

**Figure S14.** Mono-dimensional free-energy profiles computed for the **M-H<sub>4</sub>TPPS<sub>4</sub><sup>2-</sup>** monomer using the PB-MetaD approach, as a function of the pyrrole dihedral angles  $\phi_1$ ,  $\phi_2$ ,  $\phi_3$ ,  $\phi_4$ . These maps have been constructed considering the data of M-H<sub>4</sub>TPPS<sub>4</sub><sup>2-</sup>, with all the four sulfonato-phenyl dihedral angles negative.

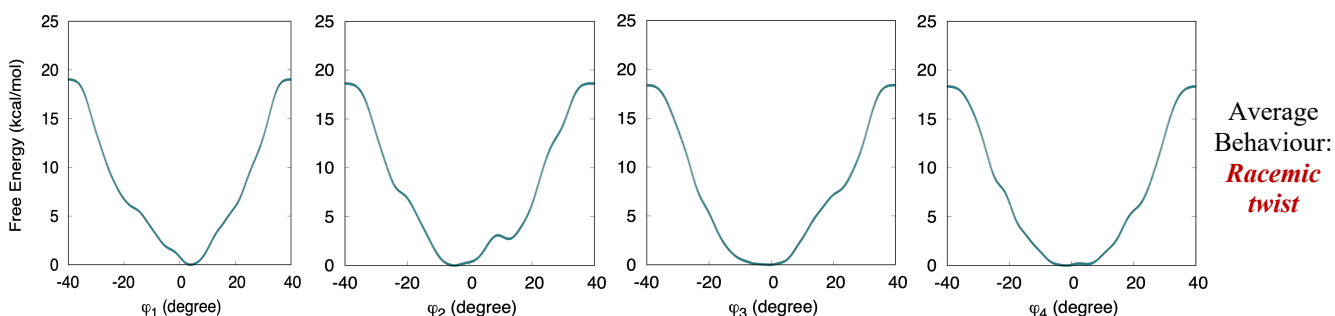

**Figure S15.** Mono-dimensional free-energy profiles computed for the **Rac-H<sub>4</sub>TPPS<sub>4</sub><sup>2-</sup>** monomer using the PB-MetaD approach, as a function of the pyrrole dihedral angles  $\phi_1$ ,  $\phi_2$ ,  $\phi_3$ ,  $\phi_4$ . These maps have been constructed considering the data of Rac-H<sub>4</sub>TPPS<sub>4</sub><sup>2-</sup>, with two sulfonato-phenyl dihedral angles positive and two negative.

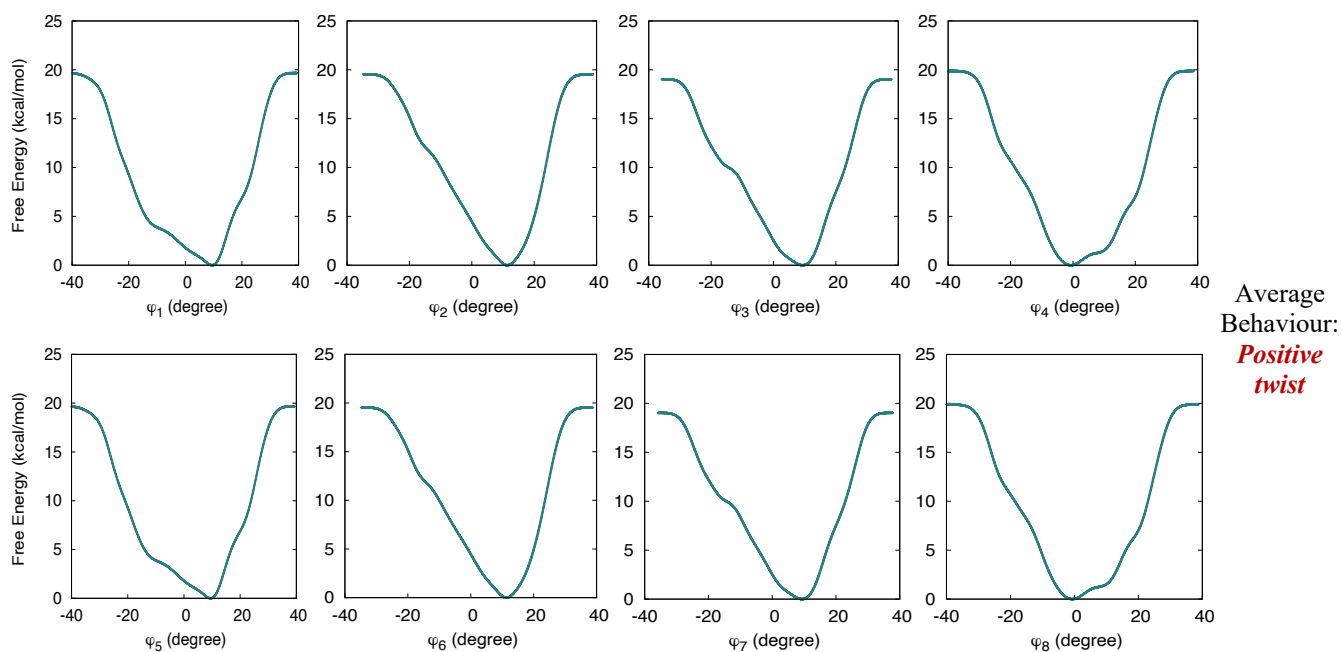

**Figure S16.** Monodimensional Free-energy profiles computed for the **P-H<sub>4</sub>TPPS<sub>4</sub><sup>2-</sup>** dimer within the PB-MetaD approach, as a function of the pyrrole dihedral angles  $\phi_1$ ,  $\phi_2$ ,  $\phi_3$ ,  $\phi_4$ . These maps have been constructed considering the data of **P-H<sub>4</sub>TPPS<sub>4</sub><sup>2-</sup>**, with all the four dihedral sulfonato-phenyl angles positive.

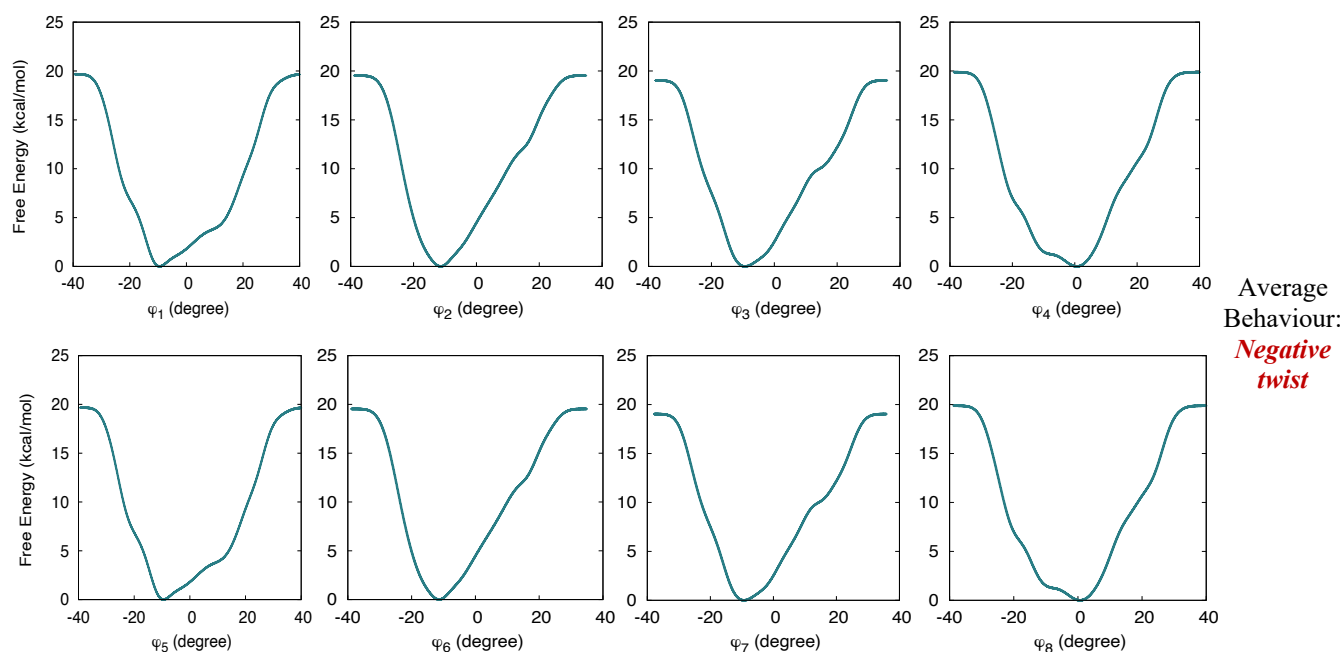

**Figure S17.** Monodimensional free-energy profiles computed for the **M-H<sub>4</sub>TPPS<sub>4</sub><sup>2-</sup>** dimer within the PB-MetaD approach, as a function of the pyrrole dihedral angles  $\phi_1$ ,  $\phi_2$ ,  $\phi_3$ ,  $\phi_4$ . These maps have been constructed considering the data of **M-H<sub>4</sub>TPPS<sub>4</sub><sup>2-</sup>**, with all the four dihedral sulfonato-phenyl angles negative.

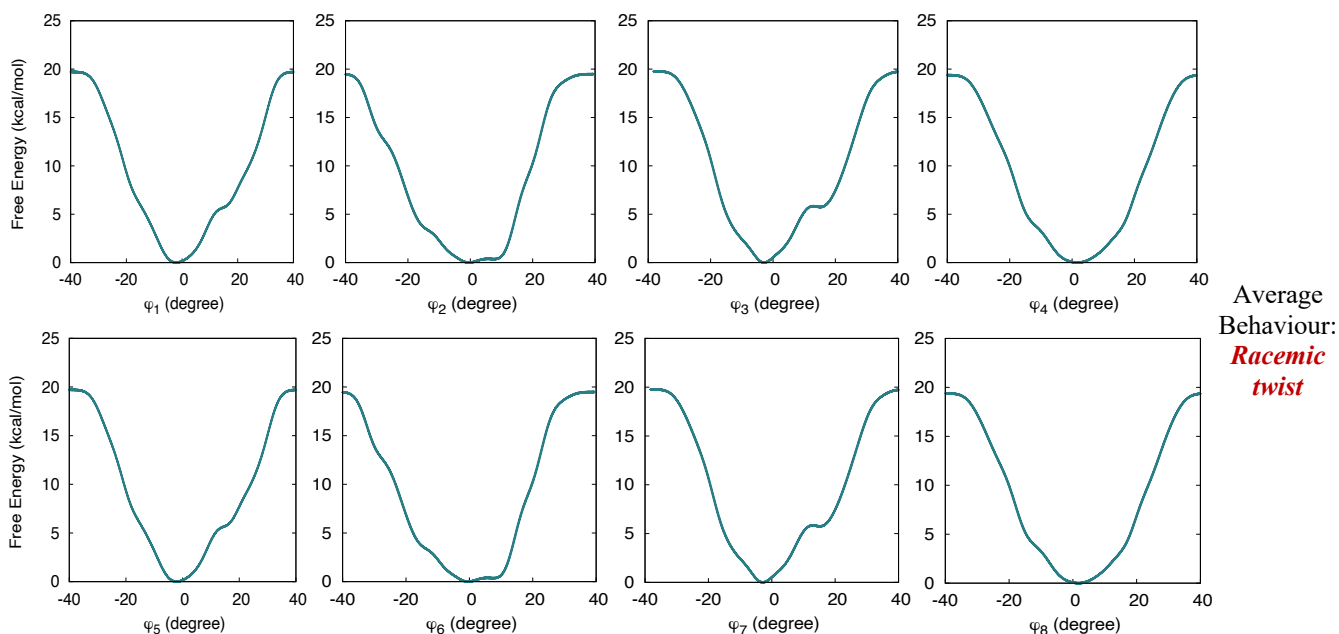

**Figure S18.** Monodimensional free-energy profiles computed for the **Rac-H<sub>4</sub>TPPS<sub>4</sub><sup>2-</sup>** dimer within the PB-MetaD approach, as a function of the pyrrole dihedral angles  $\phi_1$ ,  $\phi_2$ ,  $\phi_3$ ,  $\phi_4$ . These maps have been constructed considering the data of **Rac-H<sub>4</sub>TPPS<sub>4</sub><sup>2-</sup>**, with two dihedral sulfonato-phenyl angles positive and two negative.

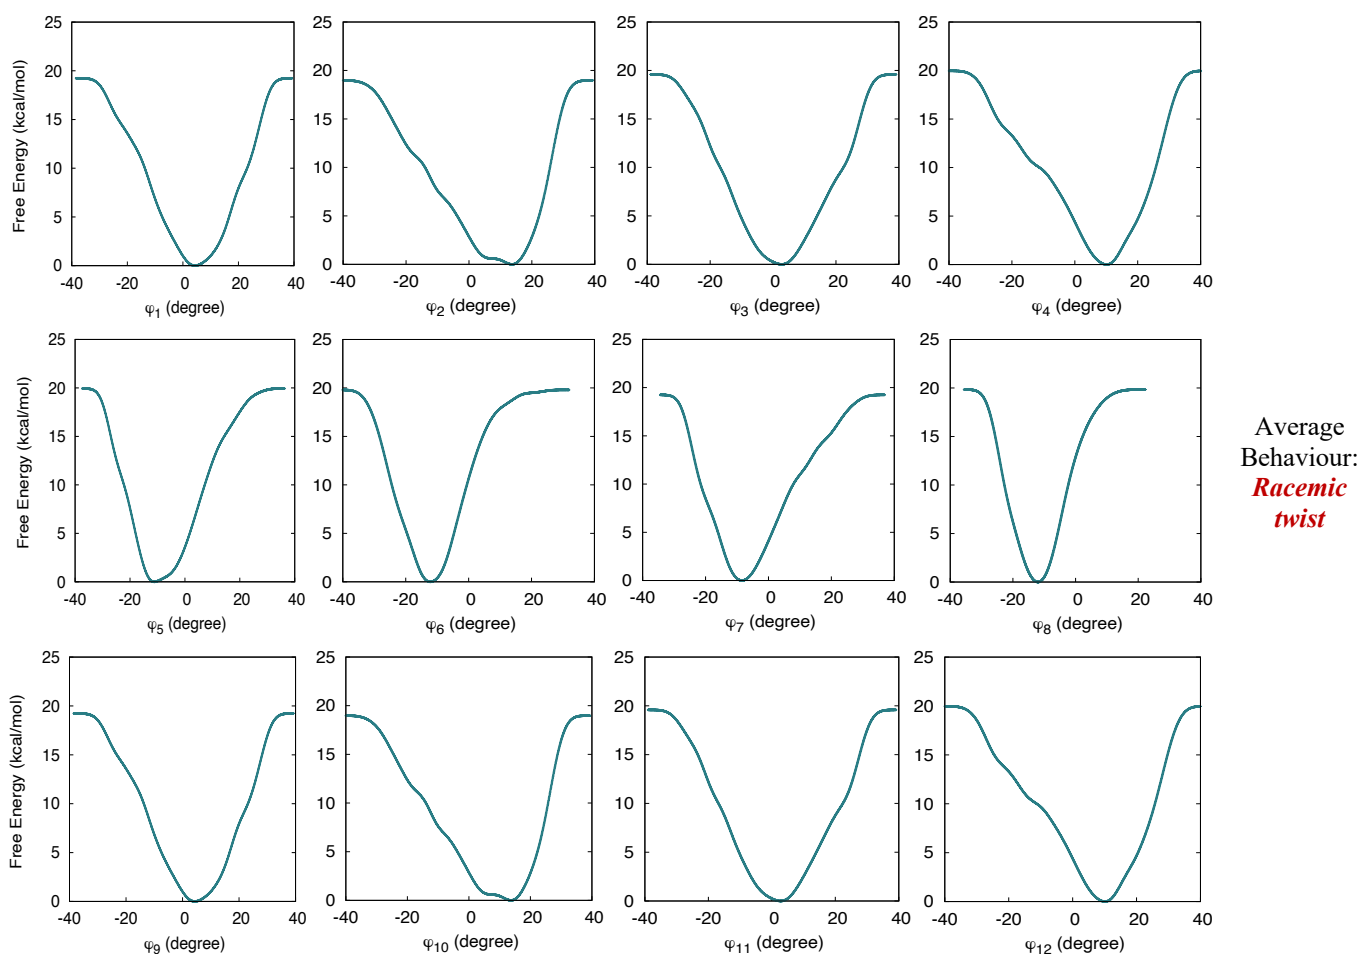

**Figure S19.** Mono-dimensional free-energy profiles computed for the **P-H<sub>4</sub>TPPS<sub>4</sub><sup>2-</sup>** trimer using the MW-MetaD approach, as a function of the pyrrole dihedral angles  $\phi_1$ ,  $\phi_2$ ,  $\phi_3$ ,  $\phi_4$ ,  $\phi_5$ ,  $\phi_6$ ,  $\phi_7$ ,  $\phi_8$ . These maps have been constructed considering the data of **M-H<sub>4</sub>TPPS<sub>4</sub><sup>2-</sup>**, having all the four sulfonato-phenyl dihedrals positive. a) Free energy profiles of external and b) internal porphyrin rings.

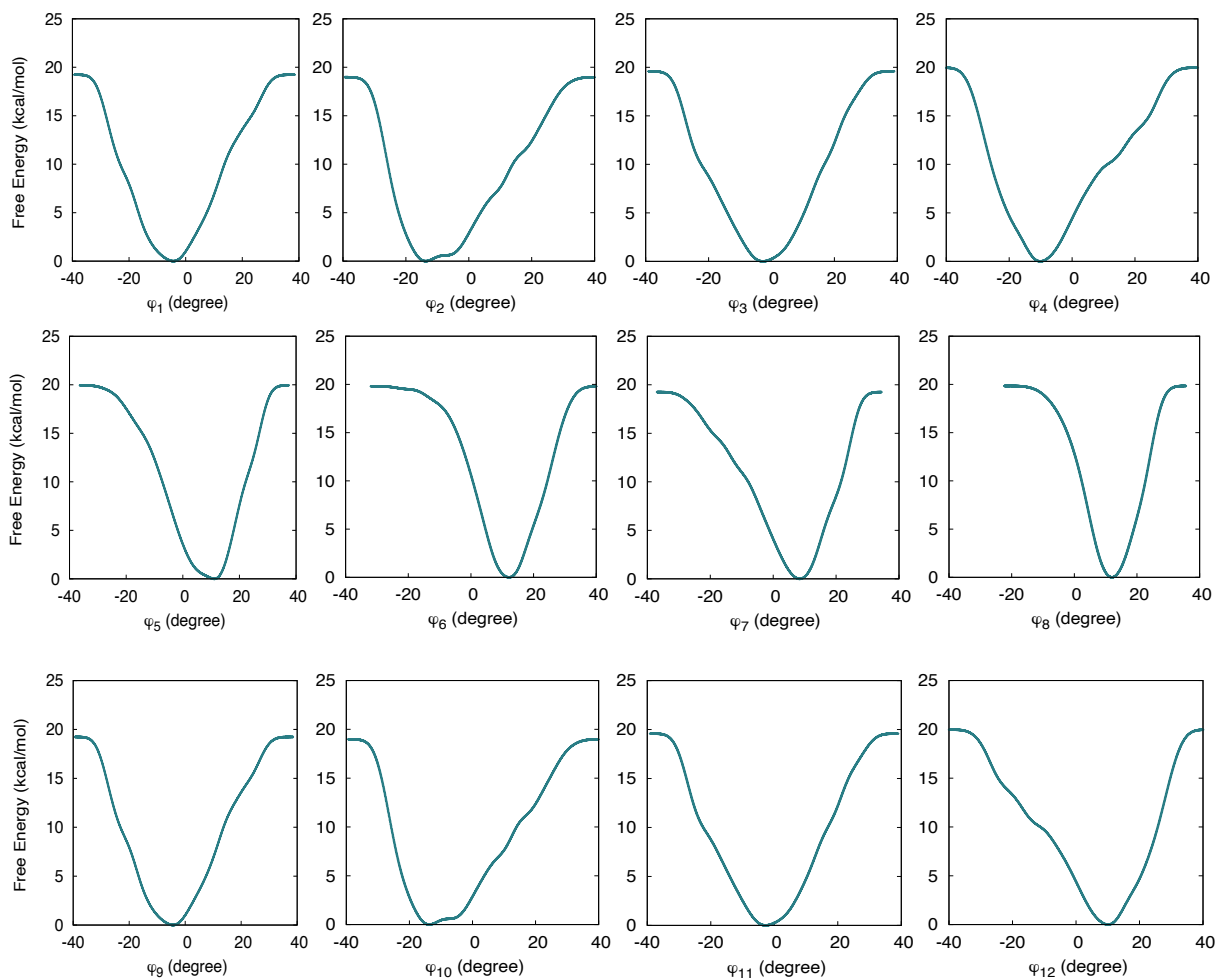

**Figure S20.** Mono-dimensional free-energy profiles computed for the  $M-H_4TPPS_4^{2-}$  trimer using the PB-MetaD approach, as a function of the pyrrole dihedral angles  $\phi_1, \phi_2, \phi_3, \phi_4, \phi_5, \phi_6, \phi_7, \phi_8$ . These maps have been constructed considering data of  $M-H_2TPPS_4^{2-}$ , having all the four sulfonato-phenyl dihedrals negative. a) Free energy profiles of external and b) internal porphyrin rings.



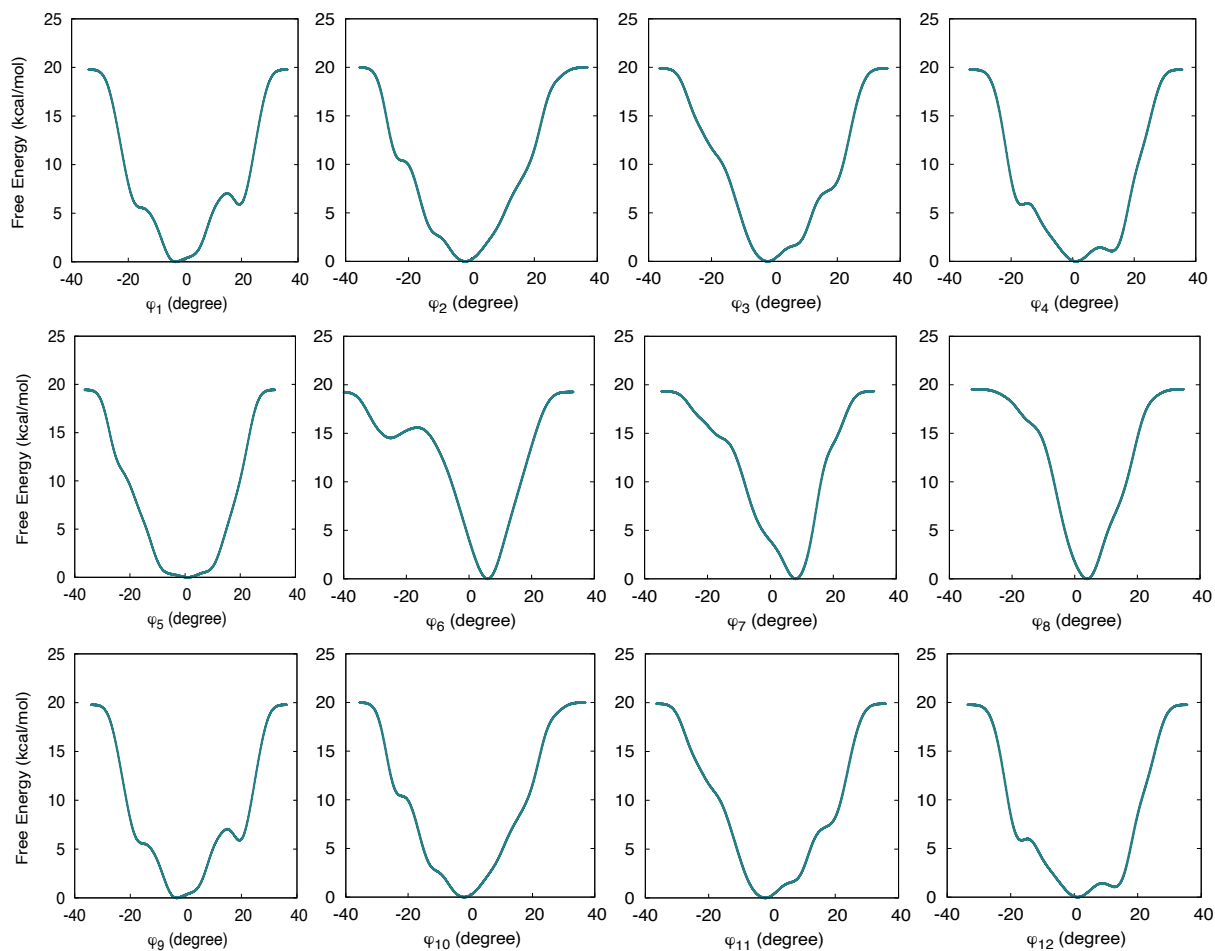

Average  
Behaviour:  
*Racemic*  
*twist*

**Figure S21.** Mono-dimensional free-energy profiles computed for the **Rac-H<sub>4</sub>TPPS<sub>4</sub><sup>2-</sup>** trimer using the PB-MetaD approach, as a function of the pyrrole dihedral angles  $\phi_1$ ,  $\phi_2$ ,  $\phi_3$ ,  $\phi_4$ . These maps have been constructed considering data of **Rac-H<sub>4</sub>TPPS<sub>4</sub><sup>2-</sup>**, having the two sulfonato-phenyl dihedrals positive and the other two negative. a) Free energy profiles of external and b) internal porphyrin rings.

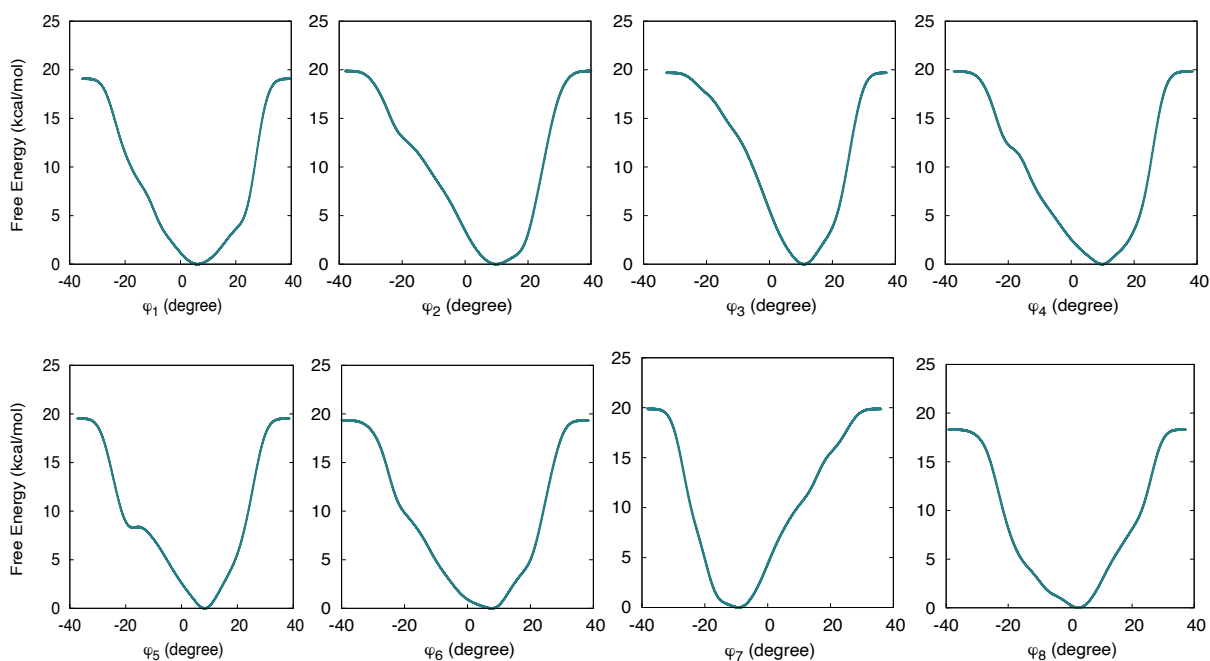

Average  
Behaviour:  
*Positive*  
*twist*

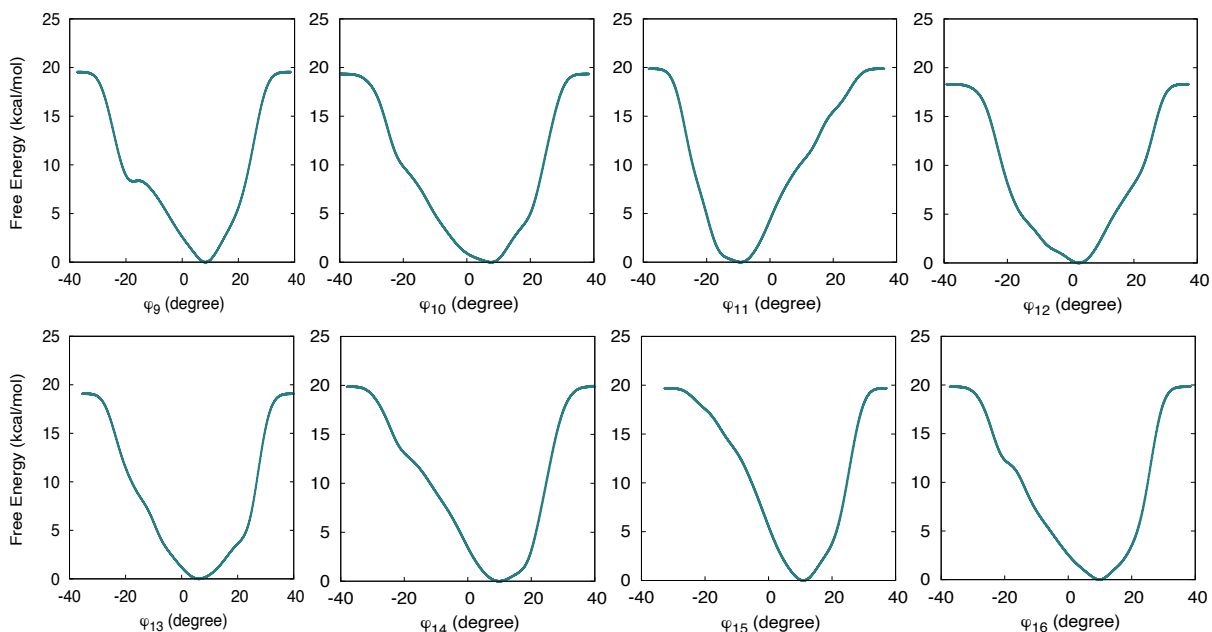

**Figure S22.** Mono-dimensional free-energy profiles computed for the P-H<sub>4</sub>TPPS<sub>4</sub><sup>2-</sup> tetramer using the MW-MetaD approach, as a function of the pyrrole dihedral angles  $\phi_1$ ,  $\phi_2$ ,  $\phi_3$ ,  $\phi_4$ ,  $\phi_5$ ,  $\phi_6$ ,  $\phi_7$ ,  $\phi_8$ . These maps have been constructed considering data of P-H<sub>4</sub>TPPS<sub>4</sub><sup>2-</sup>, having the four dihedral sulfonato-phenyl angles positive. a) Free energy profiles of a) external and b) internal porphyrin rings.

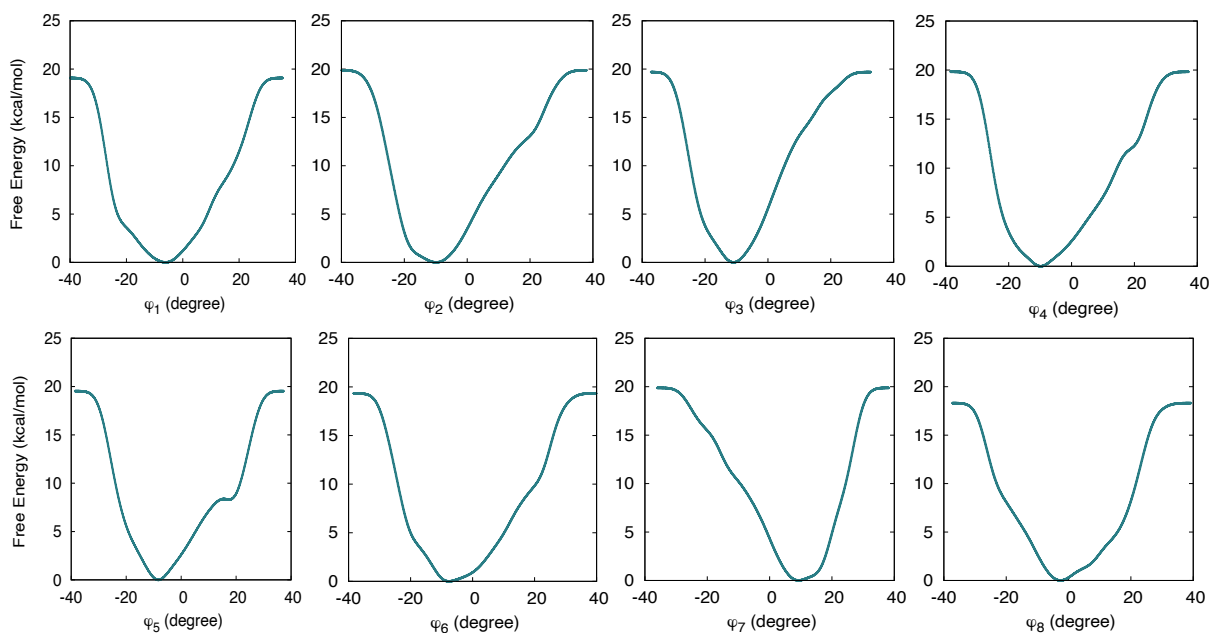

Average  
Behaviour:  
*Positive  
twist*

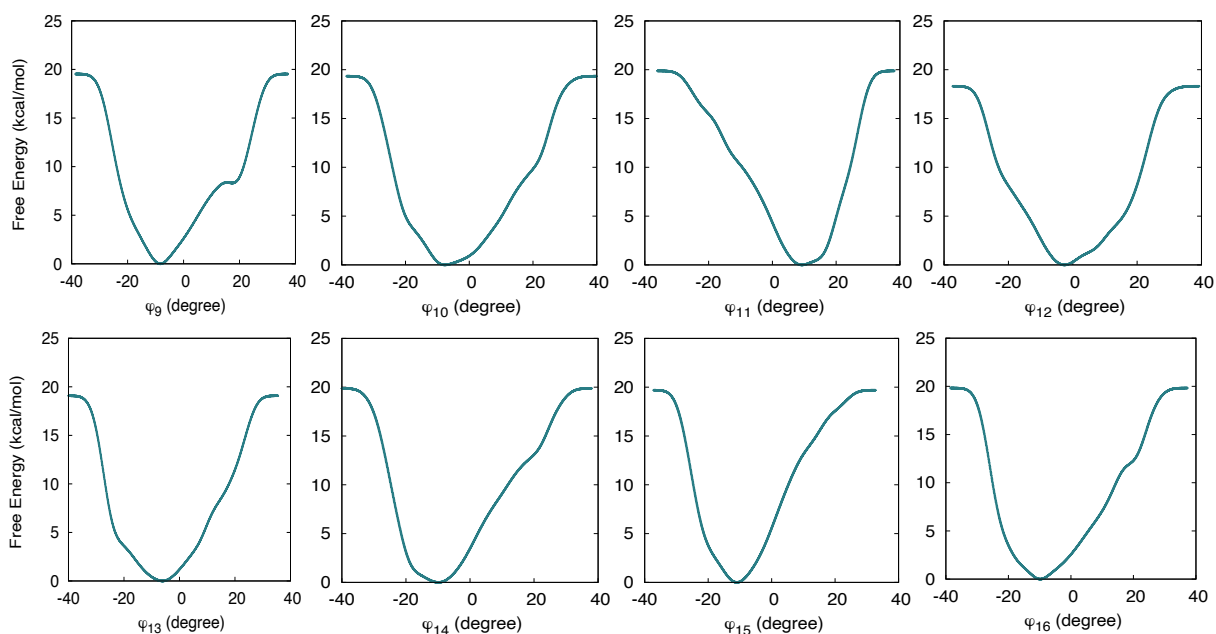

**Figure S23.** Mono-dimensional free-energy profiles computed for the  $\text{M-H}_4\text{TPPS}_4^{2-}$  tetramer using the MW-MetaD approach, as a function of the pyrrole dihedral angles  $\phi_1, \phi_2, \phi_3, \phi_4, \phi_5, \phi_6, \phi_7, \phi_8$ . These maps have been constructed considering data of  $\text{P-H}_4\text{TPPS}_4^{2-}$ , that is structure that have all four dihedral sulfonato-phenyl angles negative. a) Free energy profiles of external porphyrin rings and b) free energy profiles of internal porphyrin rings.

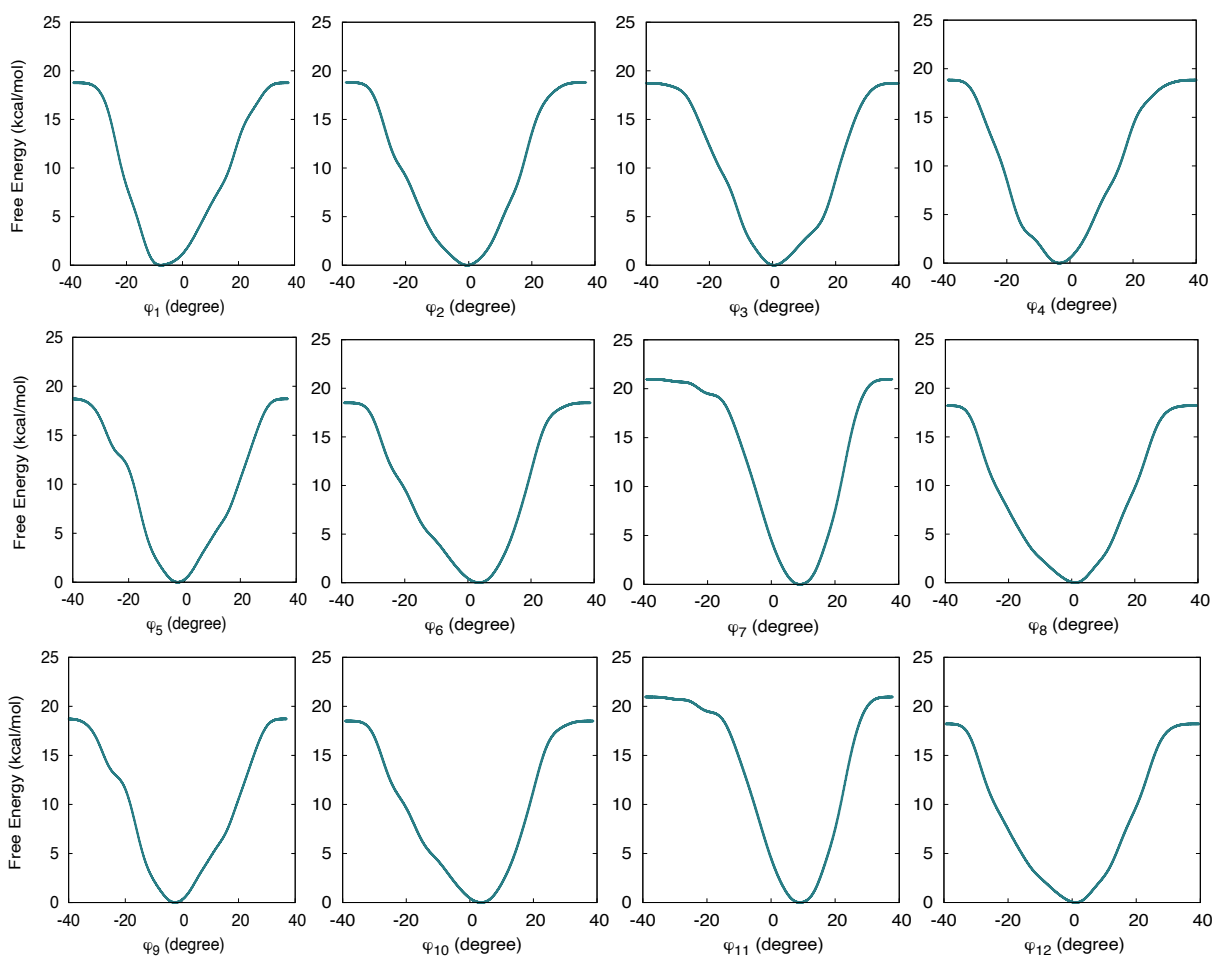

Average  
Behaviour:  
*Negative  
twist*

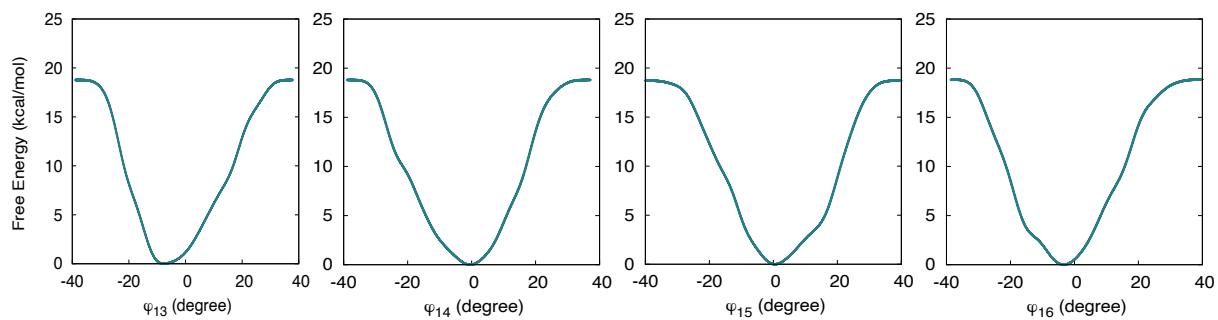

**Figure S24.** Mono-dimensional free-energy profiles computed for the **Rac-H<sub>4</sub>TPPS<sub>4</sub><sup>2-</sup>** tetramer using the MW-MetaD approach, as a function of the pyrrole dihedral angles  $\phi_1, \phi_2, \phi_3, \phi_4, \phi_5, \phi_6, \phi_7, \phi_8$ . These maps have been constructed considering data of P-H<sub>4</sub>TPPS<sub>4</sub><sup>2-</sup>, that is structure that have all four dihedral sulfonato-phenyl angles positive. a) Free energy profiles of external porphyrin rings and b) free energy profiles of internal porphyrin rings.
